# Supplementary material for: Molecular design of host materials based on triphenylamine/oxadiazole hybrids for excellent deep-red phosphorescent organic light-emitting diodes
Source: Royal Society of Chemistry journal article supplement (doi:10.1039/b920227g), 2010-01-01
Supplement: b920227g.pdf [file b920227g.pdf]

## Electronic Supplementary Information (ESI)

### Molecular Design of Host Materials Based on Triphenylamine/Oxadiazole Hybrids for Excellent Deep-Red Phosphorescent Organic Light-Emitting Diodes

Youtian Tao,<sup>a</sup> Qiang Wang,<sup>bc</sup> Liang Ao,<sup>a</sup> Cheng Zhong,<sup>a</sup> Jingui Qin,<sup>a</sup> Chuluo Yang,<sup>\*a</sup> and Dongge Ma<sup>\*b</sup>

<sup>a</sup>Department of Chemistry, Hubei Key Lab on Organic and Polymeric Optoelectronic Materials, Wuhan University, Wuhan 430072, People's Republic of China. Email: [chlyang@whu.edu.cn](mailto:chlyang@whu.edu.cn)

<sup>b</sup>State Key Laboratory of Polymer Physics and Chemistry, Changchun Institute of Applied Chemistry, Chinese Academy of Sciences, Changchun 130022, People's Republic of China. Email: [mdg1014@ciac.jl.cn](mailto:mdg1014@ciac.jl.cn)

<sup>c</sup>The Graduate School of Chinese Academy of Sciences, Beijing, (100039) P. R. China

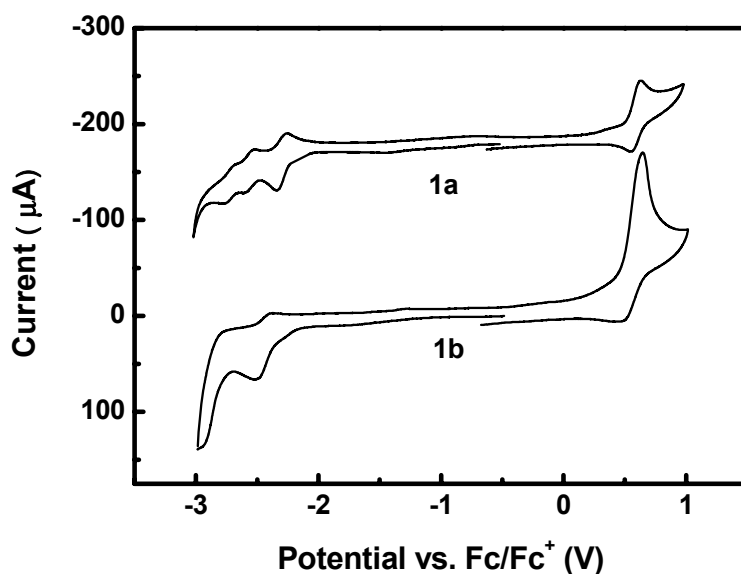

Figure S1. Cyclic voltammograms for 1a-1b.

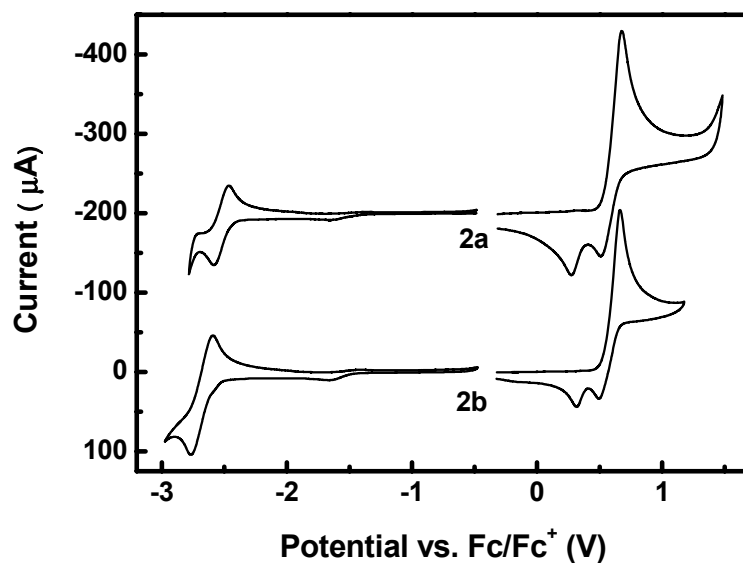

Figure S2. Cyclic voltammograms for 2a-2b.

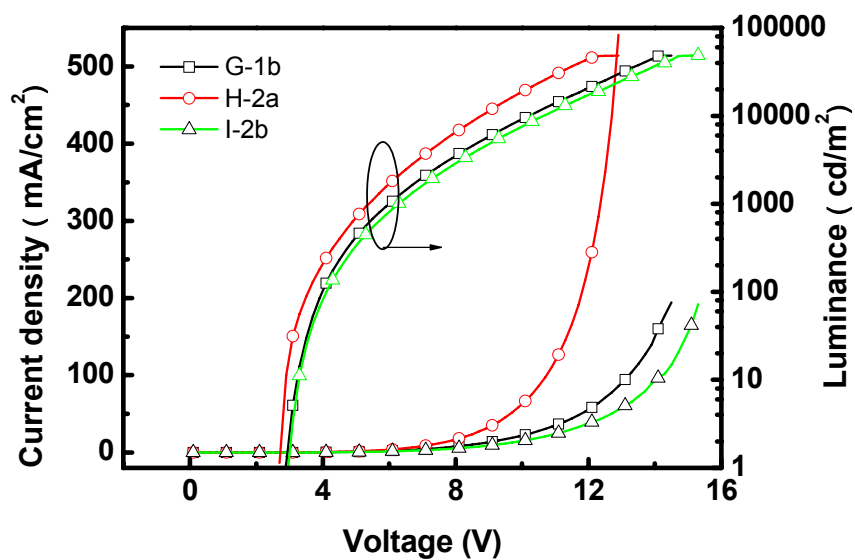

Figure S3 Luminance-voltage-current density (L-V-J) characteristics for green devices G-I.

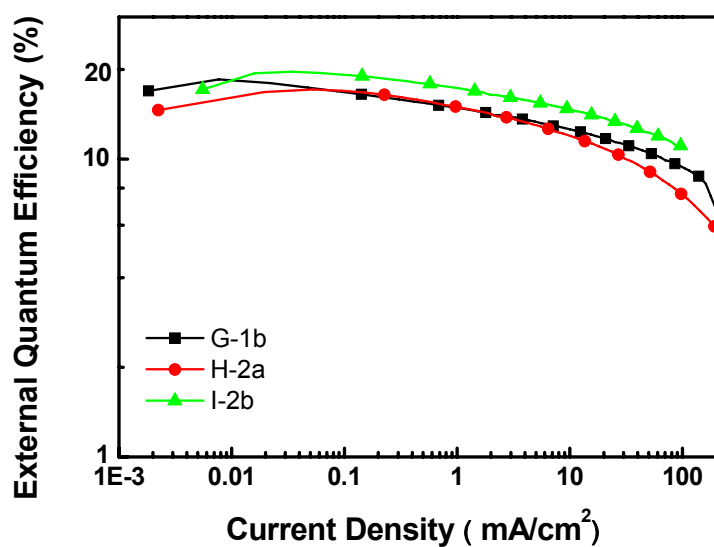

Figure S4 External Quantum efficiency *versus* current density for green devices G-I.

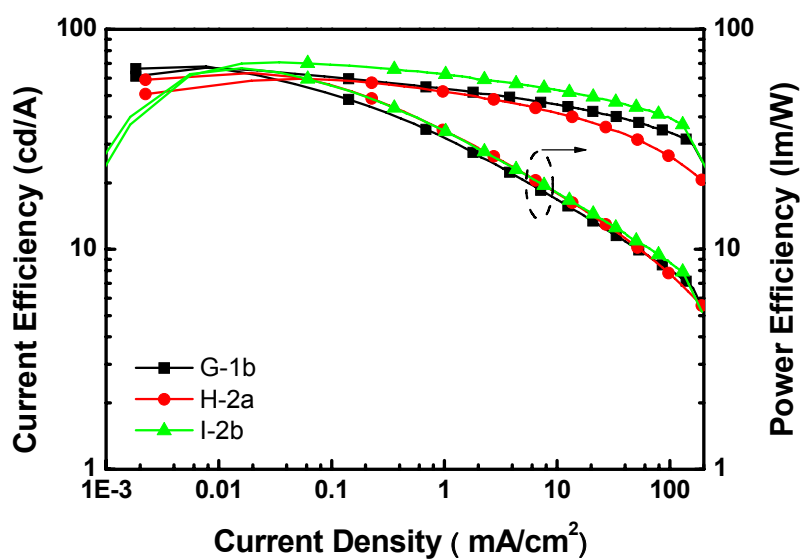

Figure S5 Current and Power efficiency *versus* current density for green devices G-I.
